# Supplementary material
Source: Research Square preprint supplement (doi:10.21203/rs.3.rs-9683449/v1)
Supplement: Supplementary file 1 [file 8bb62e0df0dca3013378481f.docx]

**Table 1**

Descriptive statistics of the dataset used for canonical correlation analysis a

| **Variable** | **Mean** | **SD** | **Min** | **Max** |
| --- | --- | --- | --- | --- |
| Chemical components |  |  |  |  |
| Ca2+, cmolc kg⁻¹ | 1.913 | 2.770 | 0.100 | 17.020 |
| Mg2+, cmolc kg⁻¹ | 1.169 | 2.225 | 0.030 | 14.570 |
| K+, cmolc kg⁻¹ | 0.114 | 0.123 | 0.010 | 0.997 |
| Na+, cmolc kg⁻¹ | 0.077 | 0.232 | 0.000 | 2.131 |
| Al3+, cmolc kg⁻¹ | 0.411 | 0.459 | 0.000 | 2.970 |
| pH - KCl | 4.25 | 0.63 | 3.10 | 8.30 |
| Texture parameters |  |  |  |  |
| Sand (0.05–2 mm) | 787.6 | 172.8 | 124.0 | 974.0 |
| Silt (0.05–0.02 mm) | 107.7 | 128.7 | 4.0 | 642.0 |
| Clay (<0.002 mm) | 104.9 | 67.8 | 2.0 | 292.0 |

a SD = standard deviation; Min = Minimum; Max =Maximum

**Table 2**

Canonical correlations between chemical constituents and texture parameters in soils a

| Number of the canonical function | Canonical correlation (R) | Squared canonical correlation (R2) | Redundancy | Eigenvalue a | Approximate F statistics | P-value |
| --- | --- | --- | --- | --- | --- | --- |
| 1 | 0.825 | 0.680 | 0.602 | 2.126 | 11.49 | <.0001 |
| 2 | 0.642 | 0.413 | 0.046 | 0.702 | 5.96 | <.0001 |
| 3 | 0.224 | 0.050 | < 0.001 | 0.053 | 1.18 | 0.327 |

a Eigenvalue of Inv(E)*H = R2/(1-R2), in which Inv(E)*H is the product of the inverse (Inv) of the error matrix (E) and the model matrix (H). The P-value corresponds to the Wilks’ Lambda test, which was used for evaluating the significance of a canonical correlation.

**Table 3**

Canonical weights, canonical loadings, and canonical cross-loadings for the first and second canonical functions, exploring the relationship between texture parameters and chemical constituents of soils.

| **Canonical variate** | **Variables** | **Standardized canonical weights** | **Canonical loadings** | **Canonical cross-loadings** |
| --- | --- | --- | --- | --- |
| U1 | Chemical components |  |  |  |
| Ca2+, cmolc kg⁻¹ | 0.494 | 0.769 | 0.634 |
| Mg2+, cmolc kg⁻¹ | 0.370 | 0.843 | 0.695 |
| K+, cmolc kg⁻¹ | 0.200 | 0.586 | 0.484 |
| Na+, cmolc kg⁻¹ | 0.188 | 0.449 | 0.370 |
| Al3+, cmolc kg⁻¹ | 0.296 | 0.388 | 0.320 |
| pH - KCl | -0.413 | 0.018 | 0.015 |
| V1 | Texture parameters |  |  |  |
| Sand (0.05–2 mm) | -5.435 | -0.956 | -0.789 |
| Silt (0.05–0.02 mm) | -3.075 | 0.999 | 0.824 |
| Clay (<0.002 mm) | -2.080 | 0.541 | 0.446 |
|  |  |  |  |  |
| U2 | Chemical components |  |  |  |
| Ca2+, cmolc kg⁻¹ | -0.214 | 0.211 | 0.135 |
| Mg2+, cmolc kg⁻¹ | 0.381 | 0.319 | 0.205 |
| K+, cmolc kg⁻¹ | -0.321 | 0.215 | 0.138 |
| Na+, cmolc kg⁻¹ | -0.442 | 0.336 | 0.216 |
| Al3+, cmolc kg⁻¹ | 0.528 | 0.039 | 0.025 |
| pH - KCl | 1.363 | 0.822 | 0.528 |
| V2 | Texture parameters |  |  |  |
| Sand (0.05–2 mm) | 72.131 | 0.288 | 0.185 |
| Silt (0.05–0.02 mm) | 54.299 | 0.052 | 0.034 |
| Clay (<0.002 mm) | 27.249 | -0.831 | -0.534 |
